# Supplementary material for: Ultra-low-voltage ammonia production in overall chloride-rich wastewater electrolysis of HMF/nitrite enabled by a Ta-induced multi-heterostructured nanocluster catalyst with enhanced photothermal effect
Source: Royal Society of Chemistry journal article supplement (doi:10.1039/d5cc06759f), 2025-12-03
Supplement: d5cc06759f1.pdf [file d5cc06759f1.pdf]

## **Electronic Supplementary Information**

### **Ultra-Low-Voltage Ammonia Production in Overall Chloride-Rich Wastewater Electrolysis of HMF/Nitrite Enabled by a Ta-Induced Multi-Heterostructured Nanocluster Catalyst with Enhanced Photothermal Effect**

Han Xie, Xu Yao, Xintong Miao, Shenshi Zhou, Han Yan, Liping Ding\*, Qi Li\*, Yanqing Wang\*

## Experimental Section

### Materials

$\text{K}_2\text{TaF}_7$ (99.7%),  $\text{KOH}$ (95%),  $\text{NiSO}_4 \cdot 6\text{H}_2\text{O}$ (98.5%),  $\text{NaCl}$ (99.5%), thiourea(99%), sodium citrate dihydrate(99%), 5-Hydroxymethyl-2-furaldehyde(95%), ethyl alcohol and  $\text{H}_2\text{SO}_4$ (95-98wt%) were purchased from Sigma Aldrich.

### Fabrication of the Ni-Ta-S-O catalyst

The preparation process of the Ni-Ta-S-O catalyst is as follows. First, copper foam is placed in absolute ethanol and ultrasonicated for 2 minutes to remove grease and dust from the surface. Next, copper foam is placed in 5 volume%  $\text{H}_2\text{SO}_4$  solution for 2 minutes to remove the oxide layer from the surface. Last but not least, the copper foam was placed in a solution which contains 0.8g/L  $\text{K}_2\text{TaF}_7$ , 40g/L sodium citrate dihydrate, 30g/L  $\text{NiSO}_4 \cdot 6\text{H}_2\text{O}$ , 150g/L thiourea, adjust with 5 volume%  $\text{H}_2\text{SO}_4$  to a pH of about 3. Copper foam was reacted in the above solution at 60°C for 5 minutes. Each step of the process is washed with deionized water. Finally, the Ni-Ta-S-O catalyst was successfully fabricated on copper foam. The catalyst loading of Ni-Ta-S-O is about 0.189mg/cm<sup>2</sup>.

### Characterizations

The microscopic topography of the sample was observed using a field emission scanning electron microscope (SEM, Gemini SEM 300). The XRD pattern of the test sample was used with the Rigaku Ultima IV. X-ray photoelectron spectroscopy (XPS, Thermo Scientific K-Alpha) was used to analyze the surface elements of the sample. The transmission electron microscope (TEM) model number is JEOL JEM-2100HR (LaB6). EDS was tested by JEOL JSM-6510. The concentration of the product was measured using

the Shimadzu UV-1900i spectrophotometer from Japan. The HPLC (Agilent Technologies 1260 Infinity) was Used to detect product concentration.

## **Electrochemical measurements**

All electrochemical tests were performed using a CS3104M Cortest workstation. For the three-electrode configuration, Ni-Ta-S-O/CF or Ni-S/CF served as the working electrode, with a Pt counter electrode and an Hg/HgO reference electrode. The anodic compartment was filled with an electrolyte containing 1 M KOH, 0.6 M NaCl, and 0.1 M HMF, simulating a chloride-rich wastewater stream for biomass valorization. The cathodic compartment contained 1 M KOH, 0.6 M NaCl, and 1 M KNO<sub>2</sub>, representing a high-strength nitrite-laden industrial effluent. In the two-electrode system, Ni-Ta-S-O/CF was used as both anode and cathode in a unified electrolyte consisting of 1 M KOH, 1 M KNO<sub>2</sub>, 0.6 M NaCl, and 0.1 M HMF, which mimics a co-electrolysis scenario for treating complex wastewater. A Xe lamp was employed to provide simulated solar irradiation with an ntensity approximating sunlight.

The data obtained from the test are converted to relative to the RHE potential by the following formula:  $E_{RHE} = E_{Hg/HgO} + 0.059pH + 0.098V$ . LSV curves were measured at 5mV/s, the Tafel slopes were measured at 1mV/s and the LPR curves were measured at 0.167mV/s. All electrochemical test data were corrected with 90% IR compensation.

## **Supplementary Methods**

### **1. Calculating electrochemically active surface area (ECSA)**

The electric double-layer capacitance  $C_{dl}$  of the electrode is calculated by the formula  $C_{dl} = J_c/V$ . Of these,  $J_c$  is obtained by CV curves which in the range of non-Faradic current.

As can be seen from **Fig. 3d, S9f and S10e**, the  $C_{dl}$  for different contents of  $K_2TaF_7$  is 3.98mF, 6.97mF, 9.65mF, 8.49mF, 4.22mF, respectively, and the corresponding *ECSA* calculated according to  $ECSA = C_{dl} / C_s$  ( $C_s$  is usually 0.04 mF/cm<sup>2</sup>) is 99.5cm<sup>2</sup>, 174.25cm<sup>2</sup>, 241.25cm<sup>2</sup>, 212.25cm<sup>2</sup>, 105.5cm<sup>2</sup>, respectively. The  $C_{dl}$  value of Ni-Ta-S-O under different reaction time 2min, 5min, 10min and 20min is about 4.11mF, 9.65mF, 9.15mF, 9.22mF, respectively, and the corresponding *ECSA* is 102.75cm<sup>2</sup>, 241.25cm<sup>2</sup>, 228.75cm<sup>2</sup>, 230.5cm<sup>2</sup>, respectively. The  $C_{dl}$  value of Cu foam, Ni-S and Ni-Ta-S-O is 1.12mF, 3.98mF and 9.65mF, and the *ECSA* of Cu foam, Ni-S and Ni-Ta-S-O is 28cm<sup>2</sup>, 99.5cm<sup>2</sup>, 241.25cm<sup>2</sup>, respectively.

## 2. Calculating of NH<sub>3</sub> yeild

The NH<sub>3</sub> concentration in the electrolyte was determined by indolyl blue method. Dilute the electrolyte in the appropriate ratio so that the test results fall within the standard curve. The obtained sample was diluted to 4 ml, and three chromogens 4mL of 1M NaOH solution (containing 5% CH<sub>6</sub>O<sub>3</sub> and 5% C<sub>6</sub>H<sub>5</sub>Na<sub>3</sub>O<sub>7</sub>·2H<sub>2</sub>O), 2mL of 0.05M NaClO solution, and 0.4mL of a mixed solution (dissolve 1 g Na<sub>2</sub>Fe(CN)<sub>5</sub>NO·2H<sub>2</sub>O in 100 mL of ultrapure water) were added to it, mixed thoroughly, and left in the dark for 2 hours, then the absorbance at 655 nm is measured by ultraviolet spectrophotometer.

According to the linear relationship between absorbance and concentration gradient, different concentrations of NH<sub>4</sub>Cl solution were tested, and the standard curve of  $NH_4^+$  was obtained by fitting the test results shown in our as-reported article (Advanced energy materials, 2024, 14, 2402301)

$NH_4^+$  faradic efficiency was calculated by:

$$FE_{NH_4^+}(\%) = \frac{V * c_{NH_4^+}}{A * t}$$

$NH_4^+$  yield rates is calculated by:

$$NH_4^+ \text{ yeild}(\mu\text{gh}^{-1}\text{cm}^{-2}) = \frac{6 * F * c_{NH_4^+} * V}{M_{NH_4^+} * Q} * 100\%$$

Where V(mL) is the volume of the electrolyte,  $c_{NH_4^+}$ ( $\mu\text{g/mL}$ ) is the measured  $NH_4^+$  concentration, A( $\text{cm}^2$ ) is the facing area of working electrode, t(h) is the reduction time, F is the Faraday constant ( $96500\text{C}\cdot\text{mol}^{-1}$ ),  $M_{NH_4^+}$  is the relative molecular mass of  $NH_4^+$ , Q is the amount of charge consumed.

### 3. Calculating of energy saving rate

Calculating the energy expended to produce 1 mol of  $NH_3$  at the same potential by following formula:

$$W = U * I * t$$

$$t = 1\text{mol}/NH_4^+ \text{ yeild}$$

$U$ (V) is the potential vs Hg/HgO,  $I$ ( $\text{A}\cdot\text{cm}^{-2}$ ) is the current density,  $t$ (h) is the time it takes to produce 1 mol of  $NH_3$ , and the  $NH_4^+ \text{ yeild}$  ( $\mu\text{mol}\cdot\text{h}^{-1}\cdot\text{cm}^{-2}$ ) was calculated before.

### 4. Calculating of HMF Oxidation products

The main oxidation products of HMF are FDCA 、HMFCFA 、FFA. The concentration

of FDCA and HMF was calculated using a standard curve obtained from HPLC testing<sup>[29]</sup>.

Calculating of the HMF conversion:

$$HMF\ conversion = \frac{n_{(HMF\ consumption)}}{n_{(before)}} * 100\%$$

Calculating of the FDCA selectively:

$$FDCA\ selectively = \frac{n_{(FDCA)}}{n_{(HMF\ con.)}} * 100\%$$

FDCA faradic efficiency was calculated by:

$$FE_{(FDCA)}(\%) = \frac{Z * e * N_A * n_{(FDCA)}}{Q} * 100\%$$

Z is the number of electrons transferred in the reaction, while the product is FDCA, Z = 6, e is Elementary charge ( $1.6 \times 10^{-19} \text{C}$ ),  $N_A$  is Avogadro's constant ( $6.02 \times 10^{23} \text{ mol}^{-1}$ ),  $n_{(HMF\ consumption)}$  and  $n_{(FDCA)}$  was calculated before, and the Q is the amount of charge consumed.

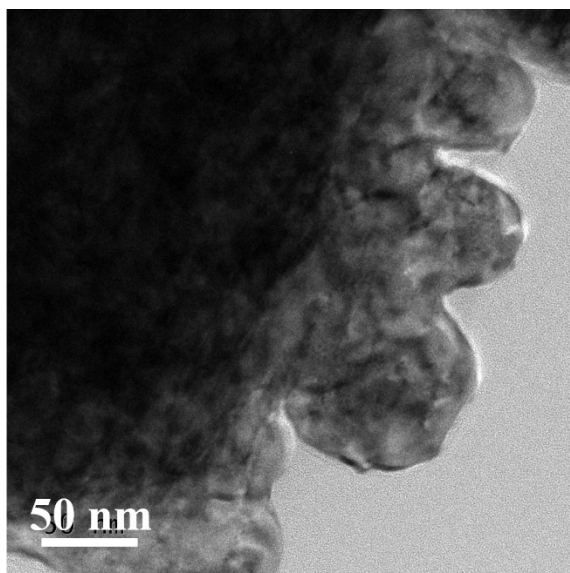

**Fig. S1** High resolution TEM image of Ni-Ta-S-O catalytic layer

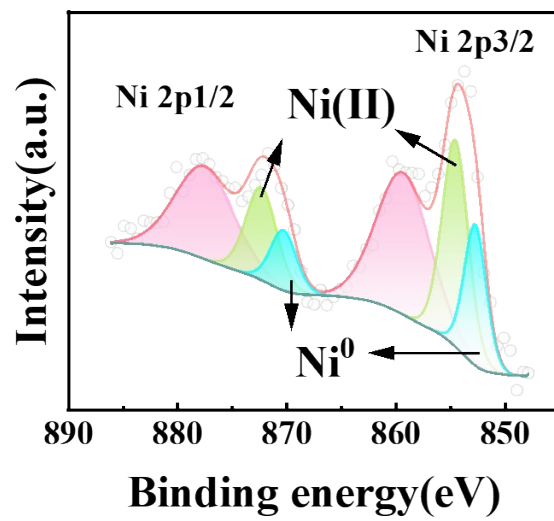

**Fig. S2** The XPS fine spectra of Ni element of Ni-S catalytic layer



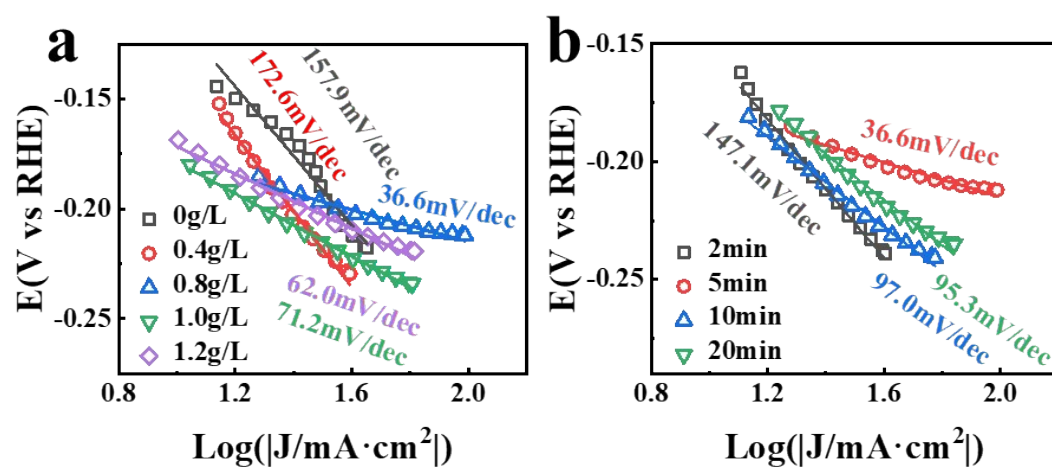

**Figure S3** The influence of different  $K_2TaF_7$  concentration(a) and reaction time(b) on NO<sub>2</sub>RR tafel performance of Ni-Ta-S-O catalyst.

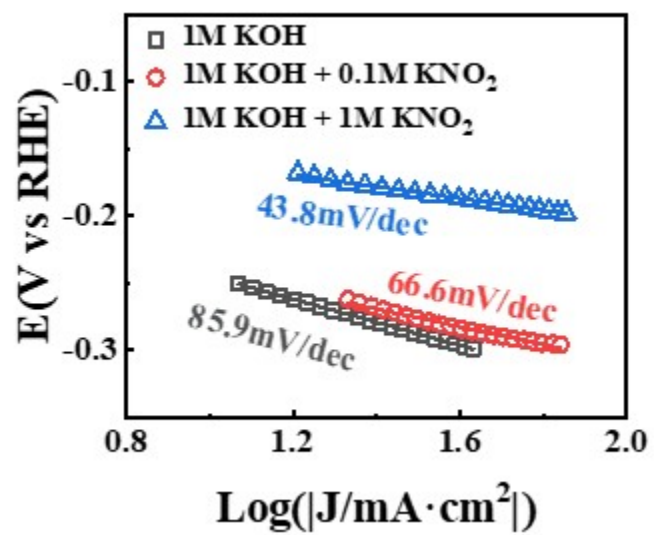

**Figure S4** The Tafel performance of Ni-Ta-S-O catalyst for HER and NO<sub>2</sub>RR in varied electrolyte.

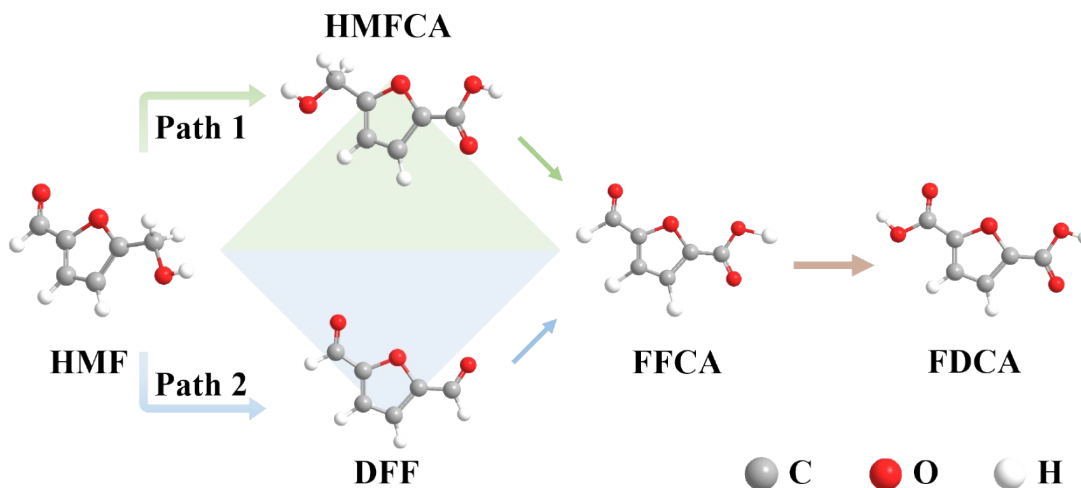

**Scheme S1** The possible pathways for 5-Hydroxymethyl-2-furaldehyde oxidization reaction (HMFOR)

**Table S1** Comparison of electrochemical polarization resistance  $R_p$  value of different catalysts under 0.55V(vs Hg/HgO)

| catalyst  | $R_p(\Omega \cdot \text{cm}^2)$ |
|-----------|---------------------------------|
| CF        | 13.59                           |
| Ni-S      | 4.15                            |
| Ni-Ta-S-O | 0.85                            |

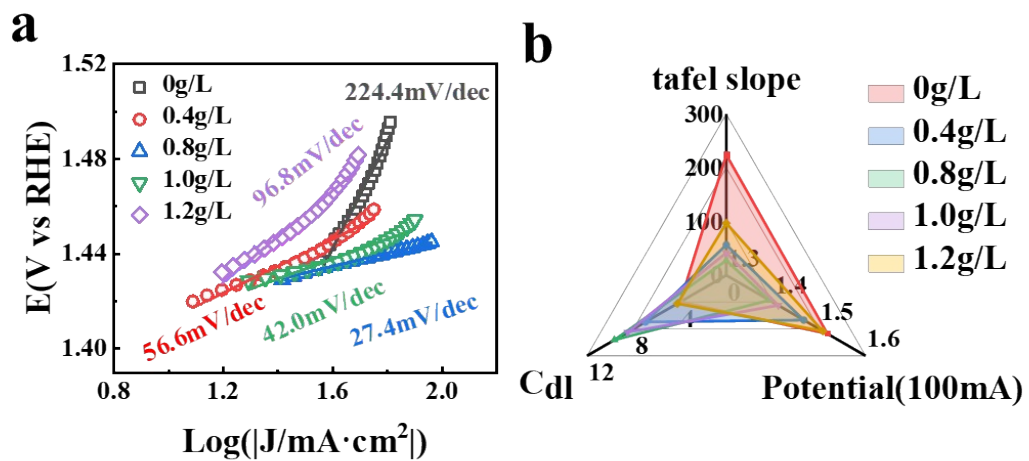

**Figure S5** The influence of different  $K_2TaF_7$  concentration on HMFOR performance of Ni-Ta-S-O

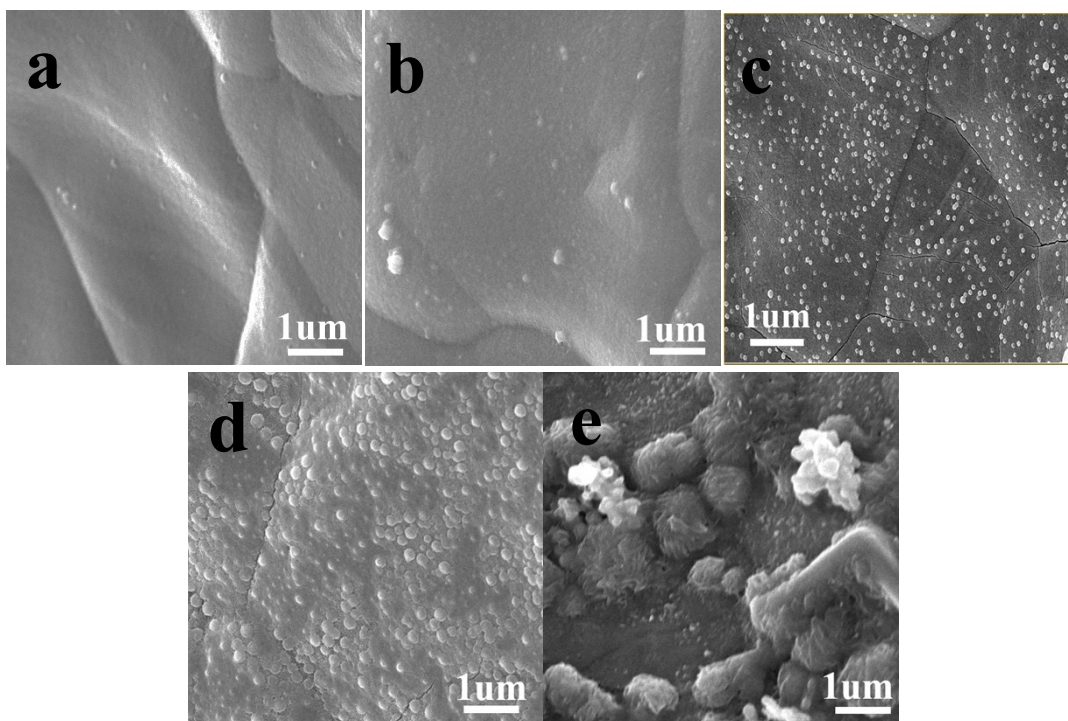

**Figure S6** The influence of different  $\text{K}_2\text{TaF}_7$  concentration on microstructure performance of Ni-Ta-S-O (a) 0 g/L (b) 0.4 g/L (c) 0.8g/L (d) 1.0 g/L (e) 1.2 g/L

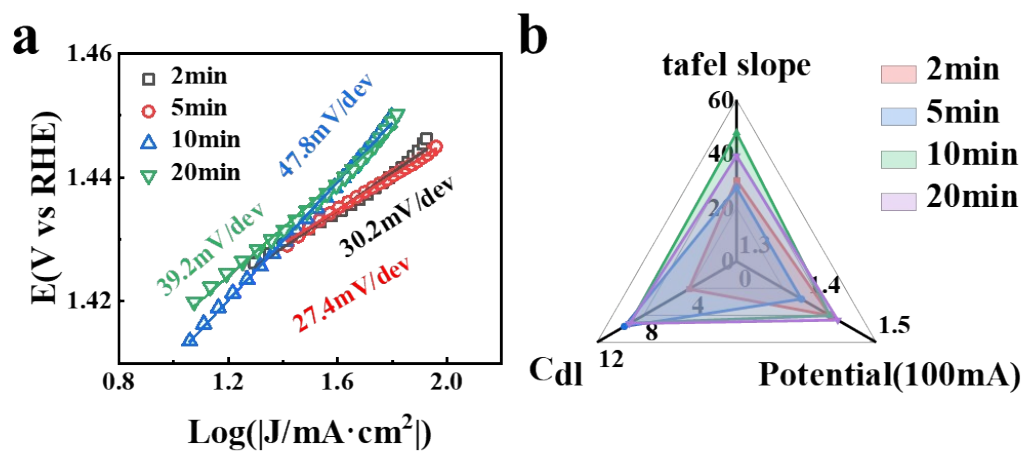

**Figure S7** The influence of different reaction time on HMFOR performance of Ni-Ta-S-O

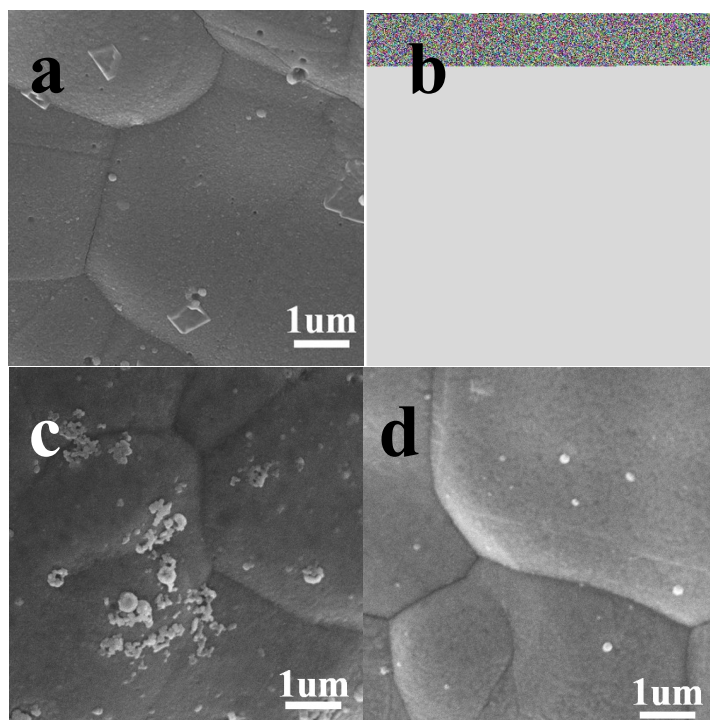

**Figure S8** The influence of different reaction time on microstructure performance of Ni-Ta-S-O (a)

2min (b) 5min (c) 10min (d) 20min

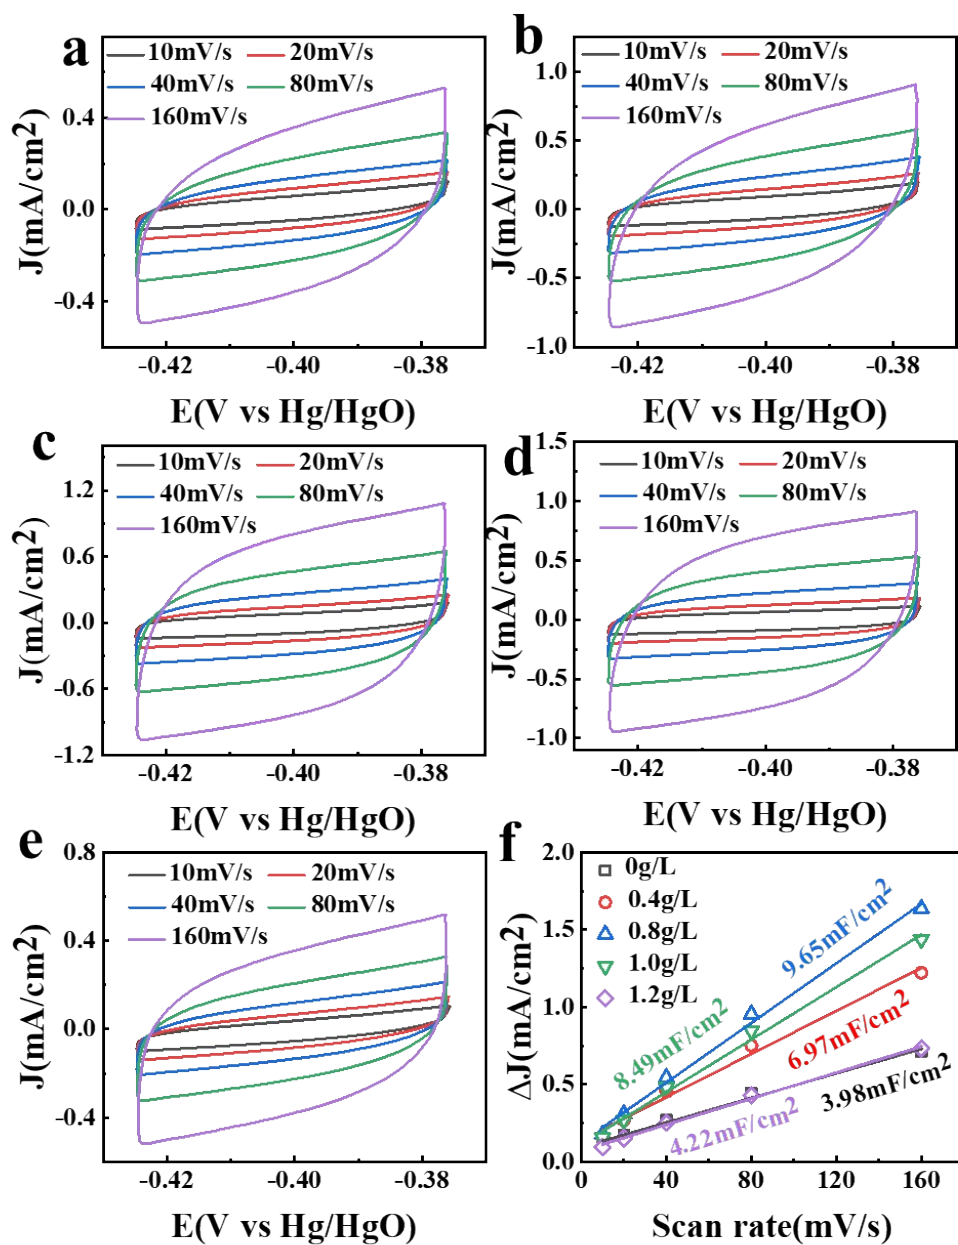

**Figure S9** The influence of different  $K_2TaF_7$  concentration on CV performance of Ni-Ta-S-O. The CV figure of the (a) 0 g/L (b) 0.4 g/L (c) 0.8 g/L (d) 1.0 g/L (e) 1.2 g/L (f) The capacitive current difference at different scan rates at -0.4V (vs Hg/HgO).



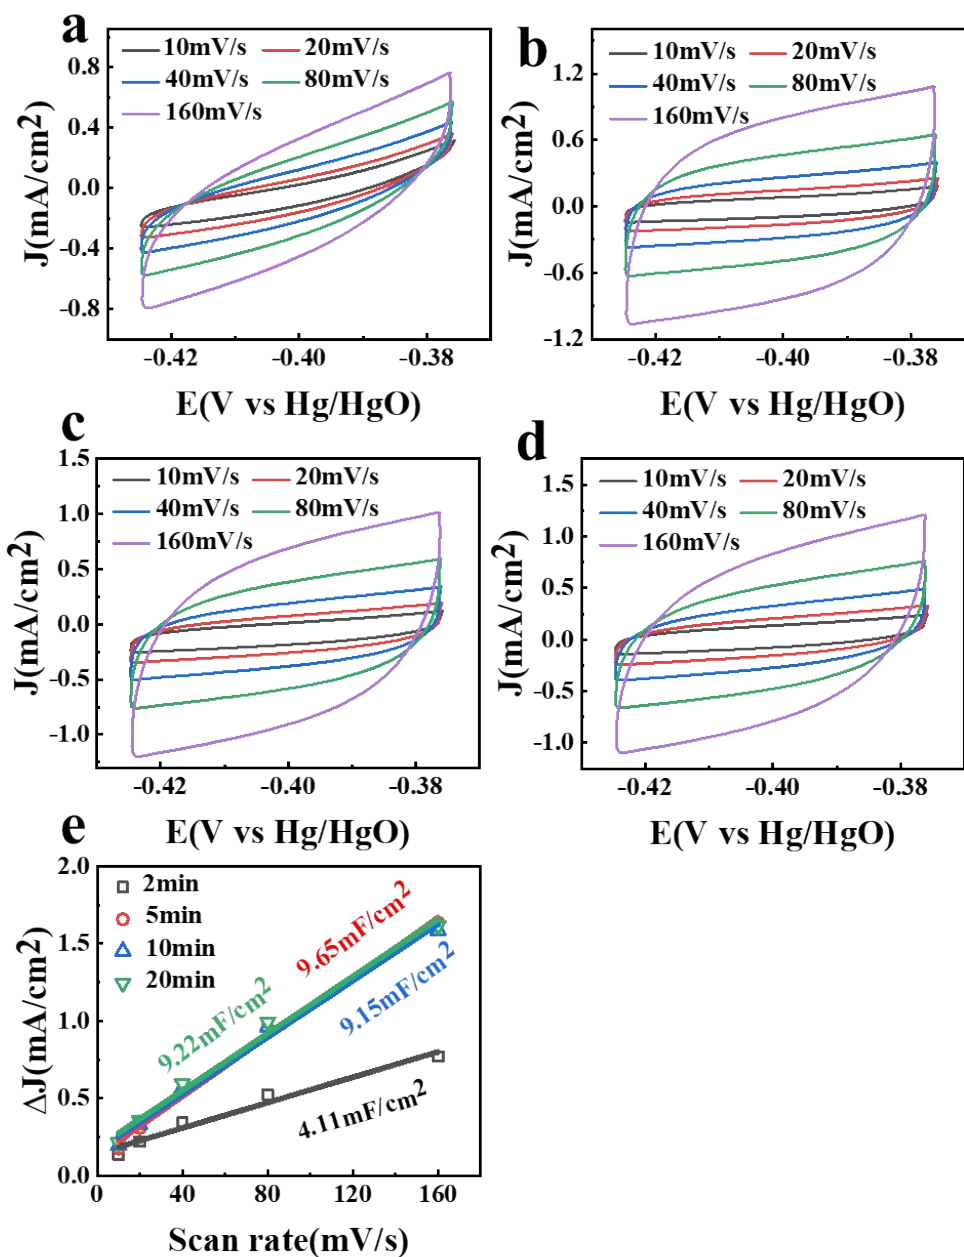

**Figure S10** The influence of different reaction time on CV performance of Ni-Ta-S-O. The CV figure of the (a) 2min (b) 5min (c) 10min (d) 20min (e) The capacitive current difference at different scan rates at -0.4V(vs Hg/HgO).

**Table S2** Comparison of electrochemical polarization resistance  $R_p$  value of different electrolyte under 0.55V(vs Hg/HgO) for Ni-Ta-S-O catalyst

| electrolyte  | $R_p(\Omega \cdot \text{cm}^2)$ |
|--------------|---------------------------------|
| KOH          | 38                              |
| KOH+HMF      | 1.38                            |
| KOH+NaCl+HMF | 0.85                            |

**Table S3** Comparison of  $\text{NO}_2\text{RR}$  performance to previously reported electrocatalysts

| FE(%) | E(V vs RHE) | $\text{NH}_3$ yield<br>( $\mu\text{mol/h} \cdot \text{cm}^2$ ) | catalyst                                         | ref       |
|-------|-------------|----------------------------------------------------------------|--------------------------------------------------|-----------|
| 70    | -0.2        | 89.6                                                           | <b><math>\text{Zn}_1/\text{MnO}_2</math></b>     | 10        |
| 76    | -0.3        | 115.4                                                          | <b><math>\text{In}_1\text{Cu}</math></b>         | 11        |
| 91    | -0.2        | 30                                                             | <b><math>\text{Cu}_2\text{O}</math> nanocube</b> | 12        |
| 75    | -0.2        | 33.3                                                           | <b><math>\text{Ni}_1\text{Ru}</math></b>         | 13        |
| 79.8  | -0.5        | 110.2                                                          | <b>L-Pd</b>                                      | 14        |
| 63.5  | -0.4        | 45.0                                                           | <b><math>\alpha\text{-CoS}_2</math></b>          | 15        |
| 72    | -0.4        | 79.2                                                           | <b><math>\text{Co}_1\text{Ru}</math></b>         | 16        |
| 69.5  | -0.2        | 31.5                                                           | <b><math>\text{CuRh}_1</math></b>                | 17        |
| 80.7  | -0.4        | 73.47                                                          | <b><math>\text{Au@CC-SDS}</math></b>             | 18        |
| 79.0  | -0.2        | 272.8                                                          | <b><math>\text{CuFe-P}</math></b>                | 19        |
| 90.2  | -0.2        | 133.0                                                          | <b><math>\text{CoP}</math> nanorray</b>          | 20        |
| 82    | -0.2        | 64.7                                                           | <b><math>\text{Ag@TiO}_2</math></b>              | 21        |
| 85    | -0.3        | 174.0                                                          | <b><math>\text{Cu@TiO}_2</math></b>              | 22        |
| 84    | -0.2        | 59.8                                                           | <b><math>\text{NiS}_2\text{@TiO}_2</math></b>    | 23        |
| 97.0  | -0.19       | 301.56 <sup>①</sup>                                            | <b>Ni-S-Ta-O</b>                                 | This work |
| 95.1  | -0.19       | 3029.63 <sup>②</sup>                                           | <b>Ni-S-Ta-O</b>                                 | This work |
| 89.7  | -0.20       | 278.86 <sup>③</sup>                                            | <b>Ni-S-Ta-O</b>                                 | This work |

Note:①1M KOH+1M  $\text{KNO}_2$ , without light;②1M KOH+1M  $\text{KNO}_2$ , with light;③1M KOH+1M  $\text{KNO}_2$ +0.6M NaCl, without light

**Table S4** Comparison of HMFOR performance to previously reported electrocatalysts

| <b>tafel slope(mV/dec)</b> | <b>potential(100mA/cm2)</b> | <b>catalyst</b>                               | <b>ref</b> |
|----------------------------|-----------------------------|-----------------------------------------------|------------|
| 49.7                       | 1.64                        | <b>S-NiFe LDH</b>                             | 1          |
| 48.3                       | 1.44                        | <b>Ni<sub>3</sub>P-Cu<sub>3</sub>P</b>        | 2          |
| 55                         | 1.42                        | <b>CoSe<sub>2</sub>/NiSe-CoSe<sub>2</sub></b> | 3          |
| 78.11                      | 1.48                        | <b>NiFeCe LDH</b>                             | 4          |
| 38                         | 1.41                        | <b>RuZn-NiFeS LDH</b>                         | 5          |
| 88.0                       | 1.35                        | <b>Ni-HITP/PW<sub>12</sub></b>                | 6          |
| 41.82                      | 1.43                        | <b>NiFeMnB</b>                                | 7          |
| 38                         | 1.42                        | <b>V<sub>O</sub>-NiCo(OH)<sub>2</sub></b>     | 8          |
| 64.8                       | 1.52                        | <b>Cu<sub>1/8</sub>-NiO</b>                   | 9          |
| 19.0                       | 1.40 <sup>①</sup>           | <b>Ni-S-Ta-O</b>                              | This work  |
| 27.4                       | 1.39 <sup>②</sup>           | <b>Ni-S-Ta-O</b>                              | This work  |
| 26.5                       | 1.37 <sup>③</sup>           | <b>Ni-S-Ta-O</b>                              | This work  |

Note:①1M KOH+0.1M HMF, without light;②1M KOH+0.6M NaCl+0.1M HMF, without light;③1M KOH+0.6M NaCl+0.1M HMF, with light

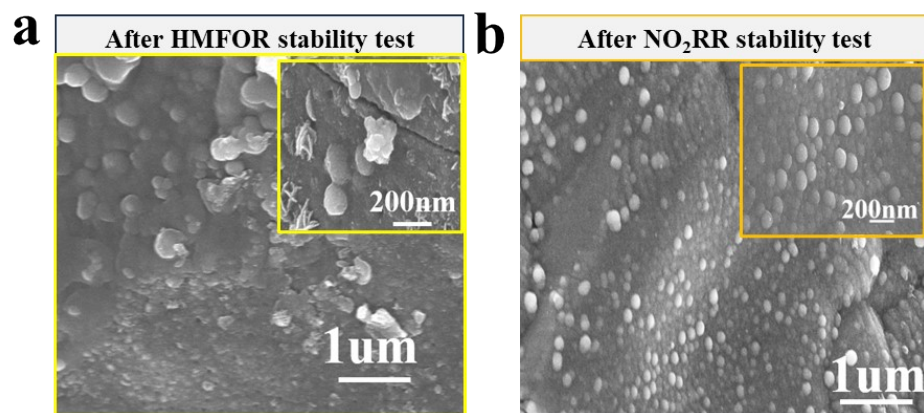

**Fig. S11** SEM image of Ni-Ta-S-O catalyst after HMFOR(b) stability test and after NO<sub>2</sub>RR(c) stability test

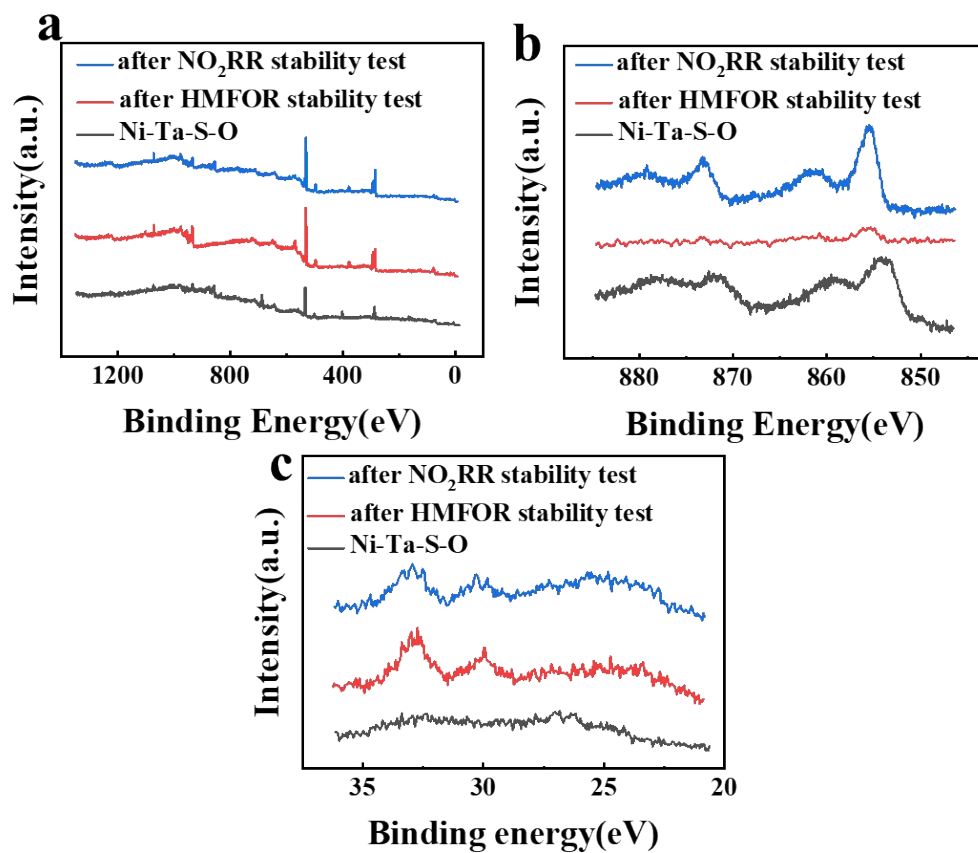

**Fig. S12** XPS full spectrum(a), Ni2p spectrum(b) and Ta 4f spectrum(c) of Ni-Ta-S-O/CF, and Ni-Ta-S-O/CF after HMFOR and after NO<sub>2</sub>RR stability tests.

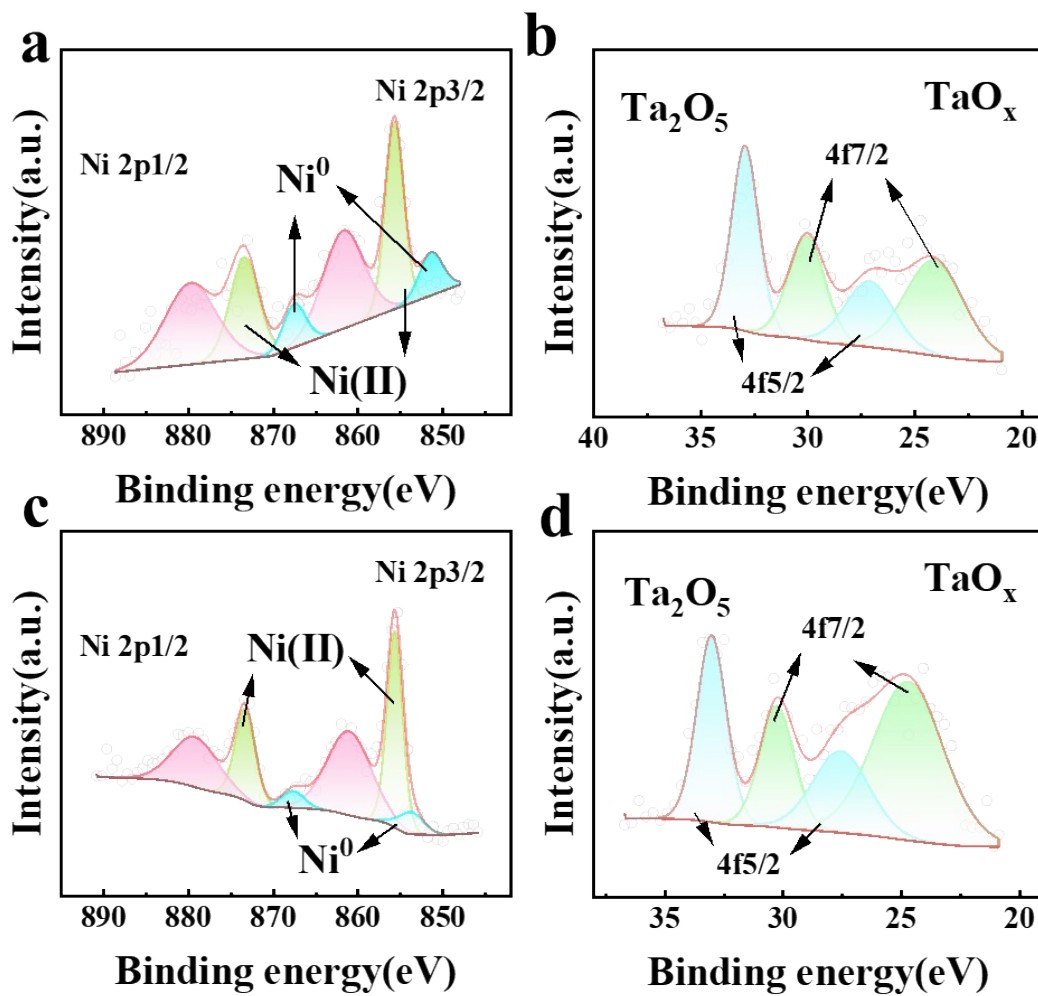

**Fig. S13** The XPS fine spectra of Ni and Ta element of Ni-Ta-S-O catalytic layer after HMFOR and NO<sub>2</sub>RR stability test. (a) The XPS fine spectra of Ni element of Ni-Ta-S-O catalytic layer after HMFOR stability test (b) The XPS fine spectra of Ta element of Ni-Ta-S-O catalytic layer after HMFOR stability test. (c) The XPS fine spectra of Ni element of Ni-Ta-S-O catalytic layer after NO<sub>2</sub>RR stability test. (d) The XPS fine spectra of Ta element of Ni-Ta-S-O catalytic layer after NO<sub>2</sub>RR stability test.

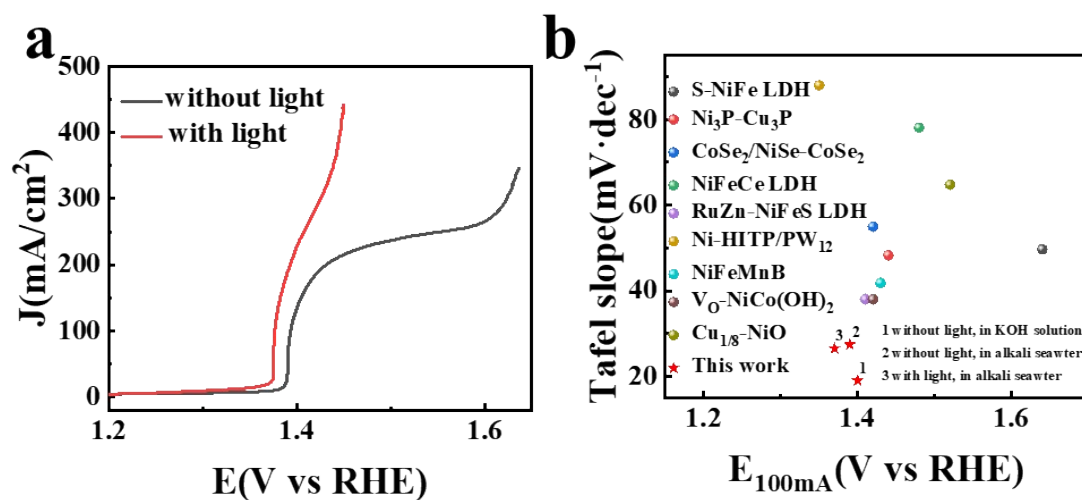

**Fig. S14** LSV performance of Ni-Ta-S-O catalyst under no light and light condition and the comparison of HMFOR performance based on as-reported HMF catalysts

**Table S5** Comparison of nitrate/nitrite to ammonia electrolytic cells performance based on previously reported dual-function electrocatalysts

| <b>catalyst</b>                                              | <b>Apply</b>             | <b>E(V)</b>                   | <b>ref</b> |
|--------------------------------------------------------------|--------------------------|-------------------------------|------------|
| <b>Cu<sub>2</sub>NCN</b>                                     | NO <sub>3</sub> RR/GlyOR | 1.51V@100mA/cm <sup>2</sup>   | 24         |
|                                                              | NO <sub>3</sub> RR/OER   | 1.78V@100mA/cm <sup>2</sup>   |            |
| <b>Ov-Co(OH)<sub>2</sub>/Cu</b>                              | NO <sub>2</sub> RR/GluOR | 1.68V@100mA/cm <sup>2</sup>   | 25         |
|                                                              | NO <sub>2</sub> RR/OER   | 2.25V@100mA/cm <sup>2</sup>   |            |
| <b>CuO/Cu<sub>3</sub>O<sub>4</sub></b>                       | NO <sub>3</sub> RR/HMFOR | 1.78V@50mA/cm <sup>2</sup>    | 26         |
| <b>Co<sub>3</sub>O<sub>4</sub>/NF</b>                        | NO <sub>2</sub> RR/OER   | 2.5V@50mA/cm <sup>2</sup>     | 27         |
|                                                              | NO <sub>2</sub> RR/SOR   | 1.7V@75mA/cm <sup>2</sup>     |            |
| <b>β-Co(OH)<sub>2</sub>/Cu<sub>2</sub>(OH)<sub>2</sub>Cl</b> | NO <sub>2</sub> RR/GlyOR | 1.82V@100mA/cm <sup>2</sup>   | 28         |
| <b>Ni-S-Ta-O</b>                                             | NO <sub>2</sub> RR/OER   | 1.94V@100mA/cm <sup>2</sup> ① | This work  |
|                                                              |                          | 1.40V@100mA/cm <sup>2</sup> ② |            |
| <b>Ni-S-Ta-O</b>                                             | NO <sub>2</sub> RR/HMFOR | 1.61V@100mA/cm <sup>2</sup> ① | This work  |
|                                                              |                          | 1.22V@100mA/cm <sup>2</sup> ② |            |

Note: ①without light;②with light



**Table S6** Comparison of electrochemical stability of previously reported dual-function electrocatalysts for nitrate/nitrite to ammonia electrolytic cells

| catalyst                                                     | Apply                    | time(h) | Current/voltage                      | ref       |
|--------------------------------------------------------------|--------------------------|---------|--------------------------------------|-----------|
|                                                              |                          |         | <sup>e</sup><br>retention<br>rate(%) |           |
| <b>Cu<sub>2</sub>NCN</b>                                     | NO <sub>3</sub> RR/GlyOR | 105     | 82.4                                 | 24        |
| <b>Ov-Co(OH)<sub>2</sub>/Cu</b>                              | NO <sub>2</sub> RR/GluOR | 48      | 76.8                                 | 25        |
| <b>CuO/Co<sub>3</sub>O<sub>4</sub></b>                       | NO <sub>3</sub> RR/HMFOR | --      | --                                   | 26        |
| <b>Co<sub>3</sub>O<sub>4</sub>/NF</b>                        | NO <sub>2</sub> RR/SOR   | 120     | 87.7                                 | 27        |
| <b>β-Co(OH)<sub>2</sub>/Cu<sub>2</sub>(OH)<sub>2</sub>Cl</b> | NO <sub>2</sub> RR/GlyOR | 24      | 91.2                                 | 28        |
| <b>Cu/NiFe LDH</b>                                           | NO <sub>3</sub> RR/OER   | 12      | 95.4                                 | 30        |
| <b>NiCoFeV-S</b>                                             | NO <sub>3</sub> RR/OER   | 25      | 97.1                                 | 31        |
| <b>NiP<sub>x</sub>/CoS<sub>x</sub></b>                       | NO <sub>3</sub> RR/SOR   | 20      | 81.3                                 | 32        |
| <b>Ni-S-Ta-O</b>                                             | NO <sub>2</sub> RR/HMFOR | 100     | 86.05                                | This work |

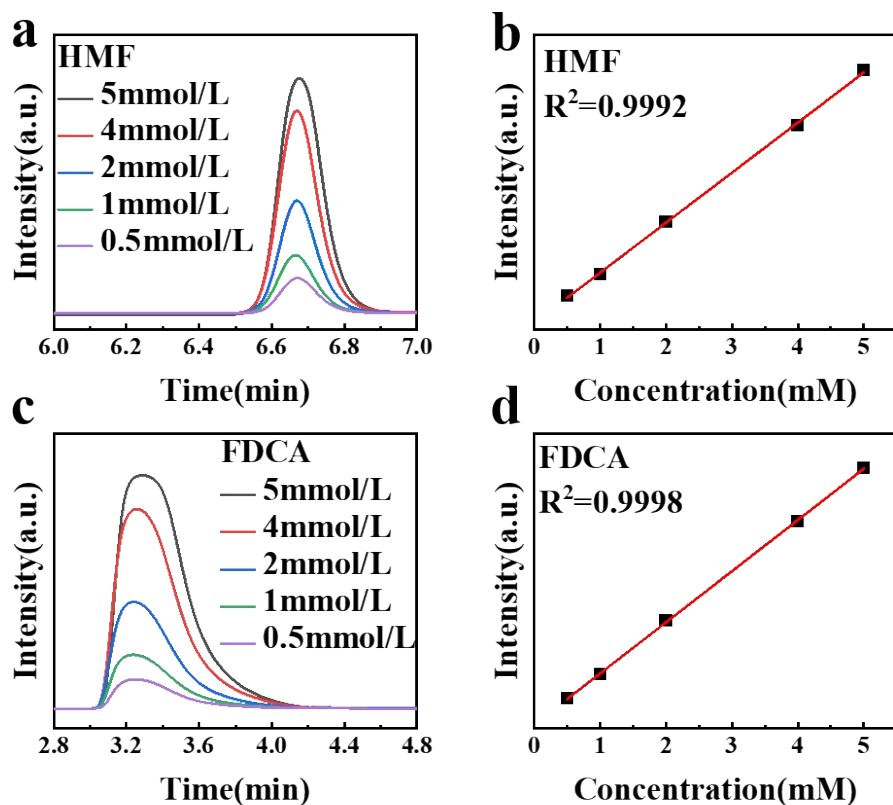

Figure S15 The peak position and standard curve of HMF (a, b) and FDCA (c, d).

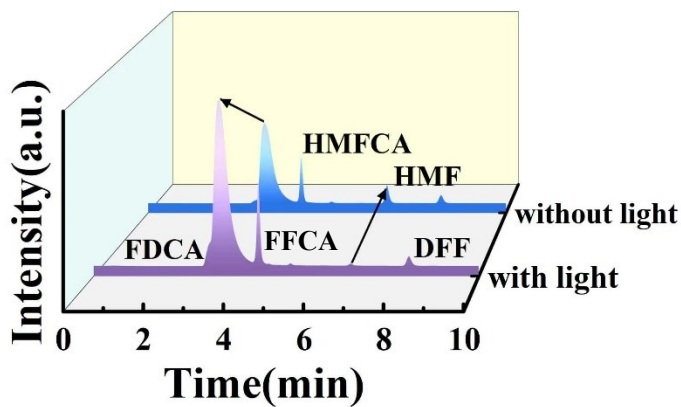

Figure S16 Comparison of FDCA product yield under pure electric field and light-electric field conditions

**Table S7** Comparison of FDCA product yield under pure electric and light-electric conditions

|                   | without light(%) | with light(%) |
|-------------------|------------------|---------------|
| HMF conversion    | 91.9             | 99.3          |
| FDCA yield        | 39.1             | 78.9          |
| F.E.(FDCA)        | 64.4             | 84.4          |
| Selectivity(FDCA) | 42.5             | 79.5          |

## REFERENCES

- 1 J. Zhang, Y. Yang, G. Ding, Z. Wang, P. Wang, C. Li, and G. Liao, *Chem. Eng. J.*, 2025, **505**, 159165.
- 2 J. Fu, G. Yang, Y. Jiao, C. Tian, H. Yan, and H. Fu, *Nano Energy*, 2024, **127**, 109727.
- 3 S. Liu, W. Cai, M. Jin, T. Zhang, Z. Zhang, Q. Liu, X. Liu, X. Zhang, and F. Wang, *Adv. Funct. Mater.*, 2025, **35**, 2421447.
- 4 Y. Zhang, G. Hai, Z. Huang, Z. Liu, X. Huang, and G. Wang, *Adv. Energy Mater.*, 2024, **14**, 2401449.
- 5 H. Xu, L. Lu, Z. Yu, X. Lu, Y. Duan, C. Si, and X. Li, *Appl. Catal. B*, 2025, **375**, 125439.
- 6 T. Bao, Y. Wu, C. Tang, Y. Xi, Y. Zou, P. Shan, C. Zhang, W. Drożd, A. R. Stefankiewicz, P. Yuan, C. Yu, and C. Liu, *Adv. Mater.*, 2025, **37**, 2500399.
- 7 L. Shi, W. Cai, F. Zhang, S. Li, X. Liu, Y. Liu, P. Ren, B. Li, S. Liu, and B. Liu, *Angew. Chem., Int. Ed.*, 2025, **64**, e202424345.
- 8 D. Xie, J. Chen, J. Hou, F. Yang, R. Feng, C. Cao, and Z. Xie, *J. Energy Chem.*, 2025, **108**, 558–566.
- 9 K. Guo, C. Du, Y. Tu, and Z. Ren, *Adv. Funct. Mater.*, 2025, 2505043.
- 10 Y. Wan, Y. Zhang, N. Zhang, Z. Zhang, and K. Chu, *Chem. Eng. J.*, 2024, **481**, 148734.
- 11 F. Wang, S. Shang, Z. Sun, X. Yang, and K. Chu, *Chem. Eng. J.*, 2024, **489**, 151410.
- 12 L. Bai, F. Franco, J. Timoshenko, C. Rettenmaier, F. Scholten, H. S. Jeon, A. Yoon, M. Rüschler, A. Herzog, F. T. Haase, S. Köhl, S. W. Chee, A. Bergmann, and B. Roldan Cuenya, *J. Am. Chem. Soc.*, 2024, **146**, 9665–9678.
- 13 F. Wang, H. Zhao, G. Zhang, H. Zhang, X. Han, and K. Chu, *Adv. Funct. Mater.*, 2024, **34**, 2308072.

- 14 W. Qu, T. Wu, J. Wang, X. Liu, Y. Tian, and K. Chu, *New J. Chem.*, 2024, **48**, 4346–4350.
- 15 Y. Qu, Y. Guo, and K. Chu, *Inorg. Chem.*, 2024, **63**, 78–83.
- 16 F. Wang, J. Xiang, G. Zhang, K. Chen, and K. Chu, *Nano Res.*, 2024, **17**, 3660–3666.
- 17 J. Xiang, C. Qiang, S. Shang, K. Chen, C. Kang, and K. Chu, *Adv. Funct. Mater.*, 2024, **34**, 2401941.
- 18 W. Zhang, T. Wang, X. Xing, H. Yin, J. Li, W. Xiong, and H. Li, *ACS Sustainable Chem. Eng.*, 2024, **12**, 10313–10324.
- 19 G. Wang, C. Wang, X. Tian, Q. Li, S. Liu, X. Zhao, G. I. N. Waterhouse, X. Zhao, X. Lv, and J. Xu, *Small*, 2024, **20**, 2311439.
- 20 G. Wen, J. Liang, Q. Liu, T. Li, X. An, F. Zhang, A. A. Alshehri, K. A. Alzahrani, Y. Luo, Q. Kong, and X. Sun, *Nano Res.*, 2022, **15**, 972–977.
- 21 Q. Liu, G. Wen, D. Zhao, L. Xie, S. Sun, L. Zhang, Y. Luo, A. A. Alshehri, M. S. Hamdy, Q. Kong, and X. Sun, *J. Colloid Interface Sci.*, 2022, **623**, 513–519.
- 22 L. Ouyang, X. Fan, Z. Li, X. He, S. Sun, Z. Cai, Y. Luo, D. Zheng, B. Ying, J. Zhang, A. A. Alshehri, Y. Wang, K. Ma, and X. Sun, *Chem. Commun.*, 2023, **59**, 1625–1628.
- 23 X. He, L. Hu, L. Xie, Z. Li, J. Chen, X. Li, J. Li, L. Zhang, X. Fang, D. Zheng, S. Sun, J. Zhang, A. A. Alshehri, Y. Luo, Q. Liu, Y. Wang, and X. Sun, *J. Colloid Interface Sci.*, 2023, **634**, 86–92.
- 24 J. Wang, H. T. D. Bui, H. Hu, S. Kong, X. Wang, H. Zhu, J. Ma, J. Xu, Y. Liu, L. Liu, W. Chen, H. Bi, M. Yang, F. Huang, T. Brinck, and J. Wang, *Adv. Mater.*, 2025, **37**, 2418451.
- 25 W. Mei, C. Chang, Z. Li, X. Wang, Y. Qie, Q. Liu, R. C. Davis, Z. Wu, Y. Yue, C. Yang, S. Li, D. Han, Q. Yang, Z. Feng, and Z. Weng, *Adv. Mater.*, 2025, 2507363.
- 26 L. Zhang, P. Jin, Z. Wu, B. Zhou, J. Jiang, A. Deng, Q. Li, T. Hussain, Y. Zhang, H. Liu, and S. Wang, *Energy Environ. Mater.*, 2024, **7**, e12725.
- 27 C. Zhang, X. Wang, J. Jiang, J. Zhang, A. Liu, and L. Ai, *Appl. Catal. B*, 2025, **365**, 124991.
- 28 M. Wang, P. Chen, H. Wang, and Y. Zhao, *J. Energy Chem.*, 2025, **104**, 185–193.
- 29 X. Jiang, W. Li, Y. Liu, L. Zhao, Z. Chen, L. Zhang, Y. Zhang, and S. Yun, *Susmat* 2023, **3**, 21-43.
- 30 F. Du, J. Yao, H. Luo, Y. Chen, Y. Qin, Y. Du, Y. Wang, W. Hou, M. Shuai, and C. Guo, *Green Chem.*, 2024, **26**(2), 895-903.
- 31 Y. Lei, L. Zhang, X. Wang, D. Wang, Y. Zhao, B. Zhang, N. Zhang, and H. Shang, *Chem. Sci.*, 2025, **16**(39), 18298-18308.
- 32 B. Tang, K. Jiang, W. Yin, W. Xing, J. Zhang, S. Pi, J. Liang, L. Tang, and W. Tang, *Small*, 2025, **21**(45), e08173.
